# Supplementary material for: A novel green phosphorescent silver(i) coordination polymer with three-fold interpenetrated CdSO4-type net generated via in situ reaction
Source: Royal Society of Chemistry journal article supplement (doi:10.1039/c0ce00546k), 2010-11-18
Supplement: c0ce00546k.pdf [file c0ce00546k.pdf]

**A novel green phosphorescent silver(I) coordination polymer  
with three-fold interpenetrated CdSO<sub>4</sub>-type net generated *via*  
*in-situ* reaction**

Yun Ling,<sup>a, b</sup> Zhen-Xia Chen,<sup>a, b</sup> Ya-Ming Zhou,<sup>\*a</sup> Lin-Hong Weng,<sup>a</sup> Dong-Yuan Zhao<sup>\*a, b</sup>

<sup>a</sup> Department of Chemistry, Fudan University, Shanghai (200433), China; Tel.: +86 21 65642261; Fax: +86 21 65643925; E-mail: [ymzhou@fudan.edu.cn](mailto:ymzhou@fudan.edu.cn)

<sup>b</sup> Laboratory of Advanced Materials, Fudan University, Shanghai (200433), China; Tel.: +86 21 51630205; Fax: +86 21 51630307; E-mail: [dyzhao@fudan.edu.cn](mailto:dyzhao@fudan.edu.cn)

**Fig. S1.** The PXRD data of the solvothermal product obtained from AgCl and dmtrz in the mixed solution of acetonitrile and water. (Peaks at  $2\theta = 27.9, 32.3, 46.3$  march well with the peaks of AgCl crystallized in Fm-3m space group with cell dimensions  $a = b = c = 5.54500$ )

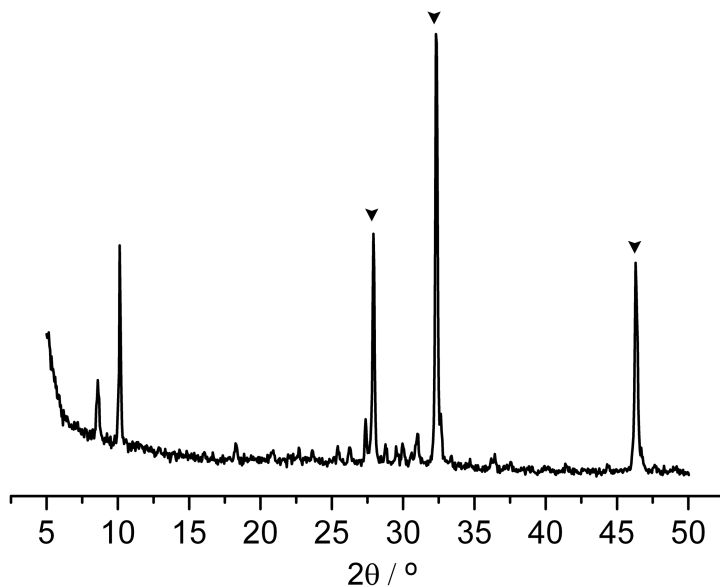

**Fig.S2.** IR data for  $[\text{Ag}_3(\text{dmtrz})_2(\text{CN})]_n$  (**1**),  $\{[\text{Ag}_7(\text{dmtrz})_6](\text{ClO}_4) \cdot 6\text{H}_2\text{O}\}_n$  (**2**),  $\{[\text{Ag}_6(\text{dmtrz})_4\text{Cl}](\text{OH}) \cdot 9\text{H}_2\text{O}\}_n$  (**3**),  $\gamma$ - $[\text{Ag}(\text{dmtrz})]_n$ , and  $\beta$ - $[\text{Ag}(\text{dmtrz})]_n$

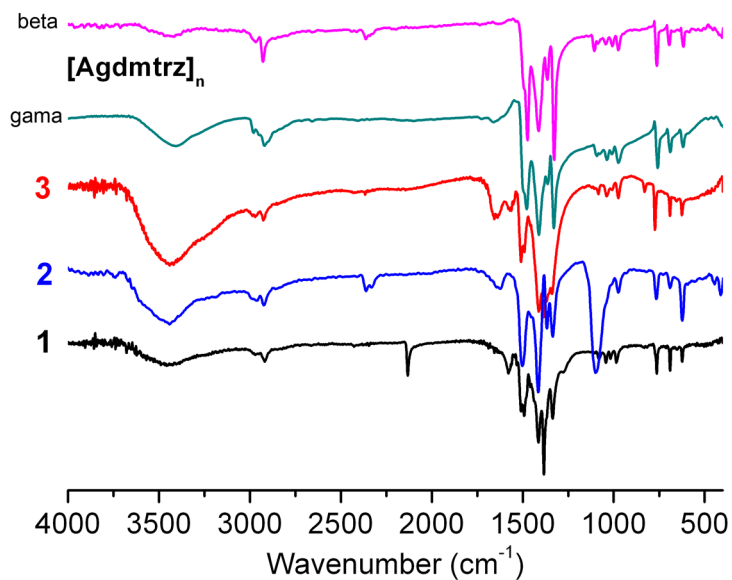

**Fig.S3.** TG curve of  $[\text{Ag}_3(\text{dmtrz})_2(\text{CN})]_n$  (**1**),  $\{[\text{Ag}_7(\text{dmtrz})_6](\text{ClO}_4) \cdot 2\text{H}_2\text{O}\}_n$  (**2**),  $\{[\text{Ag}_6(\text{dmtrz})_4\text{Cl}] \cdot (\text{OH}) \cdot \text{H}_2\text{O}\}_n$  (**3**)

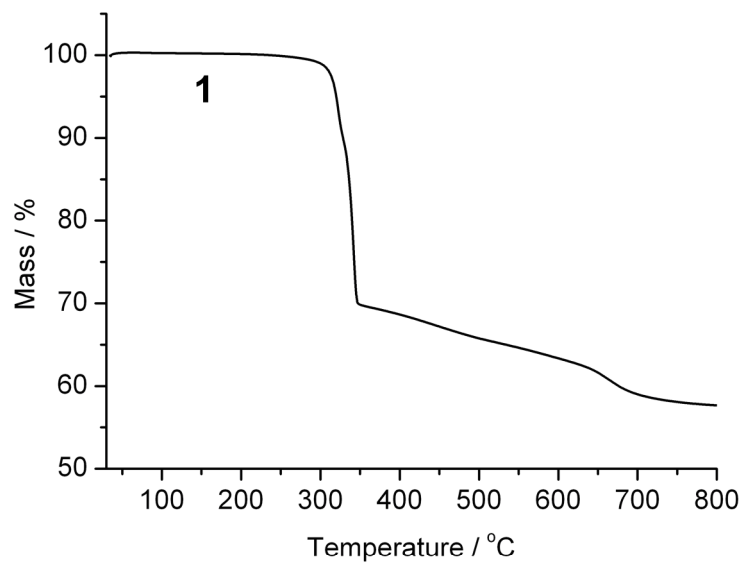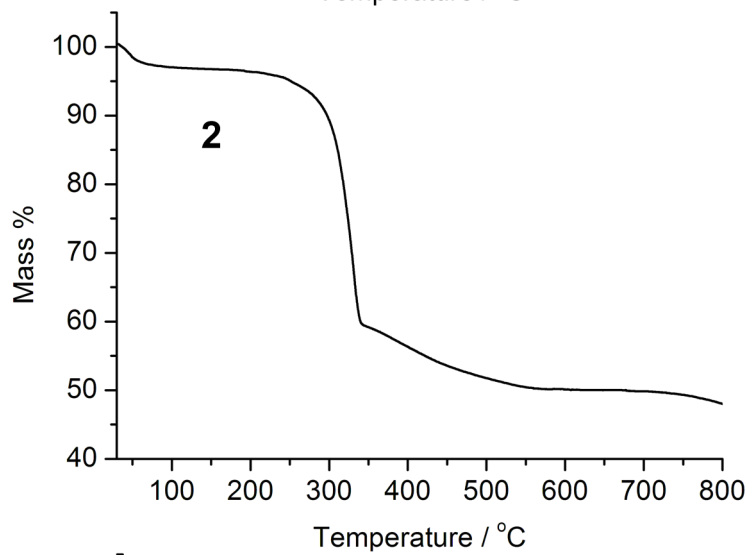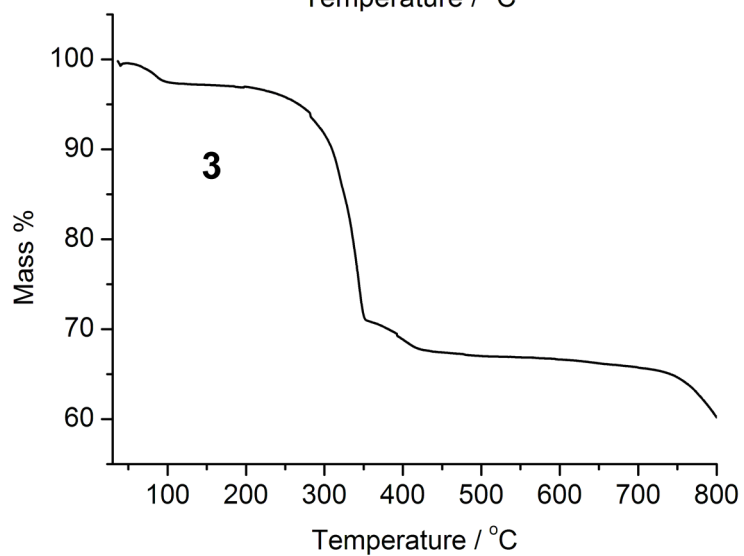

**Fig.S4.** (a) PXRD of  $[\text{Ag}_3(\text{dmtrz})_2(\text{CN})]_n$  (**1**); (b) PXRD data of  $\{[\text{Ag}_7(\text{dmtrz})_6](\text{ClO}_4) \cdot 6\text{H}_2\text{O}\}_n$  (**2**),  $\{[\text{Ag}_6(\text{dmtrz})_4\text{Cl}](\text{OH}) \cdot 9\text{H}_2\text{O}\}_n$  (**3**),  $\gamma\text{-}[\text{Ag}(\text{dmtrz})]_n$ , and  $\beta\text{-}[\text{Ag}(\text{dmtrz})]_n$  (below: simulated data; up: experimental data)

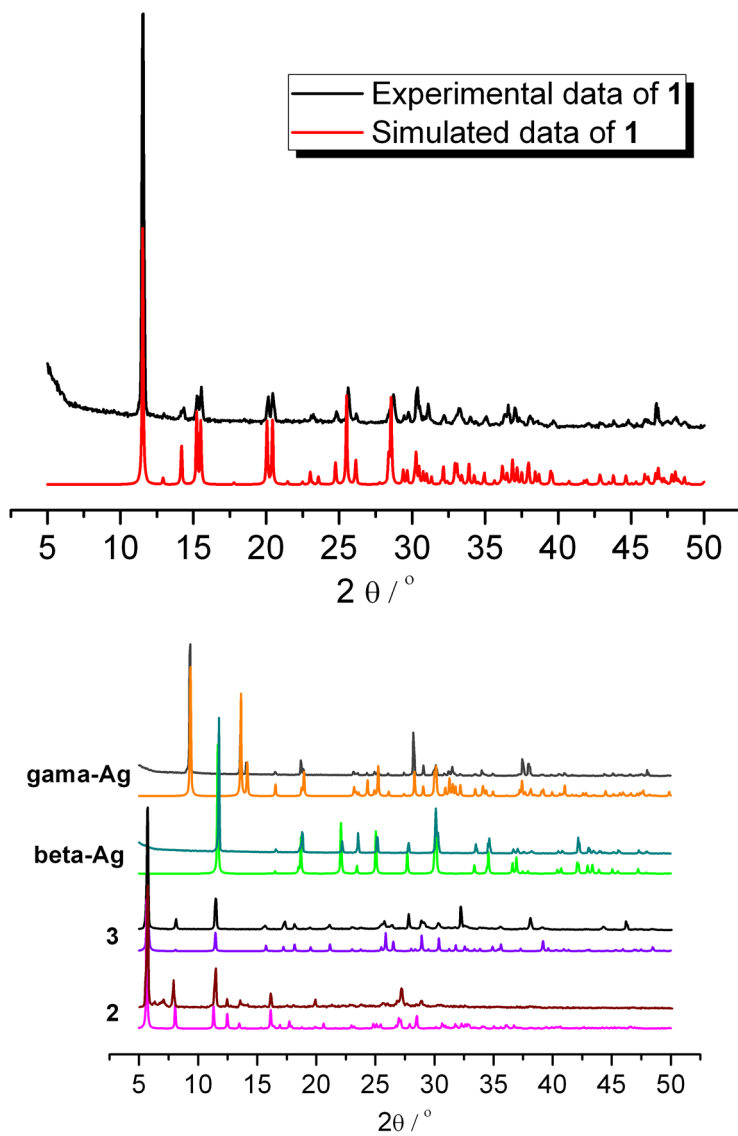



**Fig.S6.** Coordination motif (a) and the  $\text{Ag}_4(\text{dmtrz})_6^{2-}$  SBU (b) of **2** (Symmetry code: A: 1-x, 1-y, 1-z; B: 1-x, 1-y, -z; C: -1+x, 1+y, z)

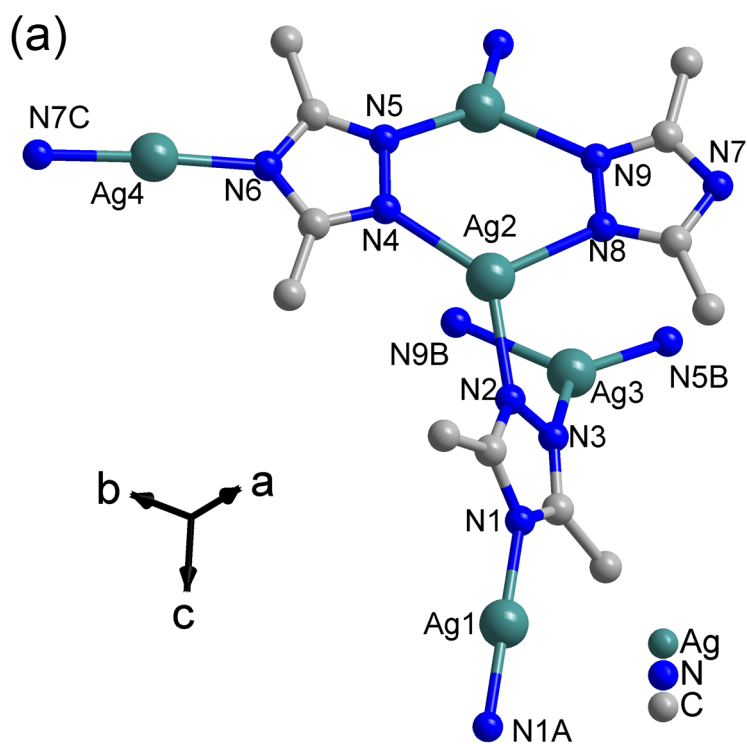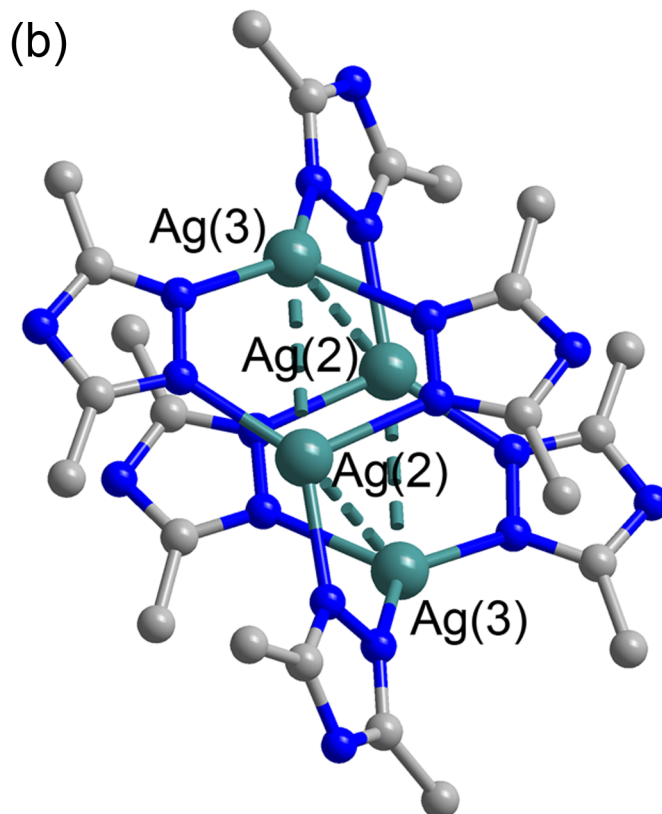



**Fig. S7.** Coordination motif in the  $\text{Ag}_4(\text{dmtrz})_4$  SBU of **3** (Symmetry code: A:  $-1+y, 1-x, z$ ;  
B:  $-0.5+y, 0.5+x, 2-z$ )

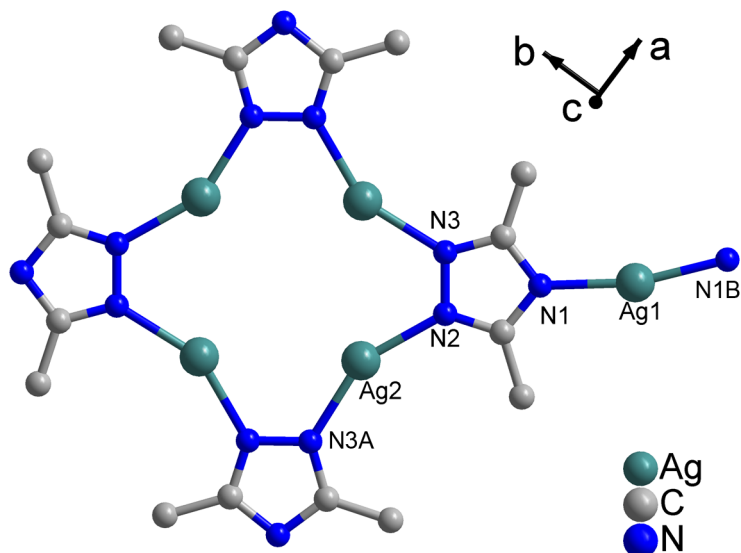

**Fig. S8.** (a) IR spectra of the products (red one (top) represents the product obtained with  $\text{AgNO}_3$  as reactant; black one (below) represents the product obtained with  $\text{AgClO}_4$  as reactant, no obvious  $\text{CN}^-$  groups were detected in the range of  $2158\sim 2135\text{ cm}^{-1}$  in the case of  $\text{AgClO}_4$ ); (b) The PXRD data of the product obtained with  $\text{AgNO}_3$  as reactant (the product obtained with  $\text{AgNO}_3$  as reactant was confirmed to be  $\text{AgCN}$  crystallized in  $R3m$  space group based on IR data and PXRD data)

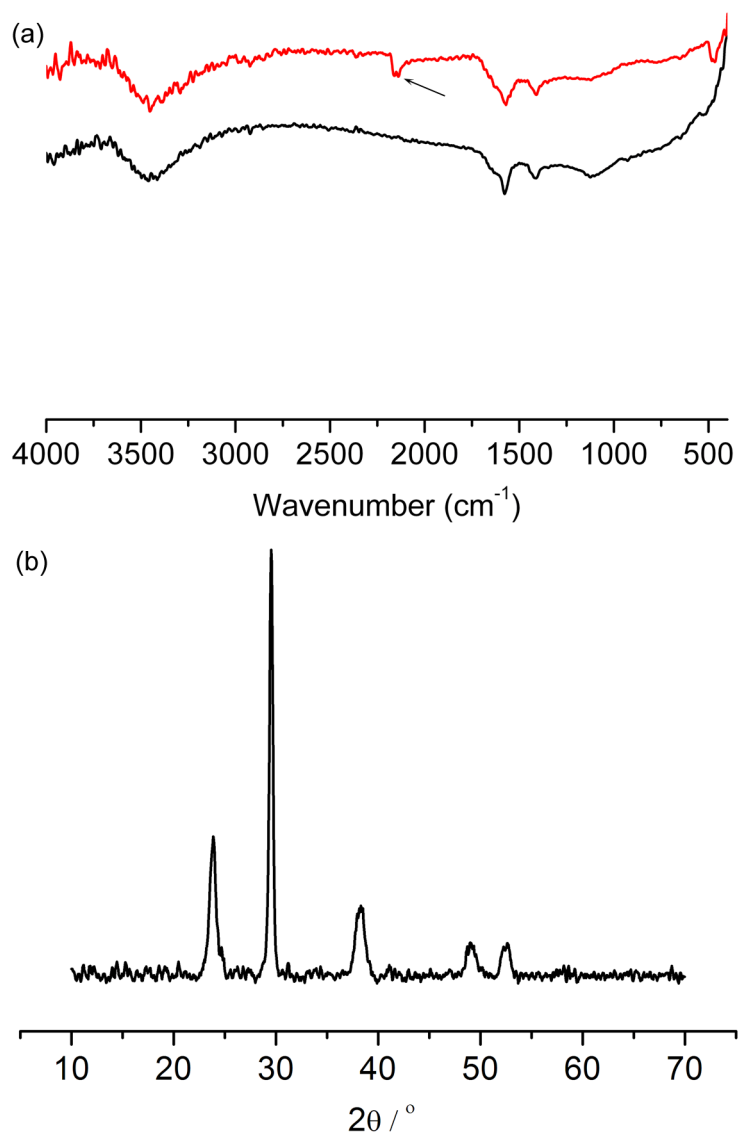

**Fig. S9.** (a) the phosphorescent emission of **1** (solid green curve) with maximum peak at 519 nm excited by 322 nm (dot red curve); (b) room-temperature luminescence decay curve of **1**

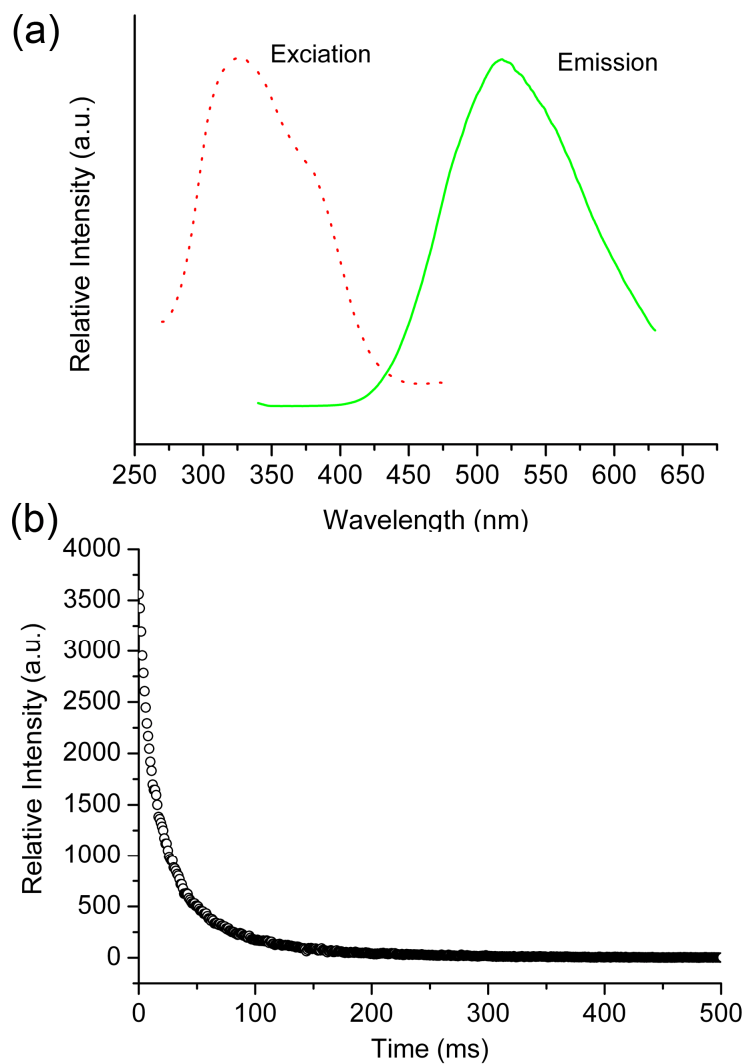

**Table S1.** Selected bond distances and angles for **1-3**

**1**

|                        |            |                             |            |
|------------------------|------------|-----------------------------|------------|
| Ag1–N1                 | 2.269(4)   | Ag1–C5(N4)                  | 2.140(5)   |
| Ag1–N2 <sup>i</sup>    | 2.196(4)   | Ag2–N3                      | 2.074(4)   |
| Ag2–N3 <sup>ii</sup>   | 2.074(4)   |                             |            |
| N1–Ag1–C5(N4)          | 115.21(16) | N2 <sup>i</sup> –Ag1–C5(N4) | 130.40(18) |
| N1–Ag1–N2 <sup>i</sup> | 113.62(14) |                             |            |

Symmetry code: i :3/2-x,3/2-y,1-z; ii: 2-x,-y,1-z

**2**

|                         |          |                                      |          |
|-------------------------|----------|--------------------------------------|----------|
| Ag1–N1                  | 2.075(6) | Ag2–N2                               | 2.232(6) |
| Ag2–N4                  | 2.204(6) | Ag2–N8                               | 2.292(6) |
| Ag3–N3                  | 2.206(7) | Ag3–N5 <sup>i</sup>                  | 2.172(6) |
| Ag3–N9 <sup>i</sup>     | 2.279(6) | Ag4–N6                               | 2.076(6) |
| Ag4–N7 <sup>ii</sup>    | 2.070(6) |                                      |          |
| N2–Ag2–N4               | 131.5(2) | N2–Ag2–N8                            | 108.4(2) |
| N4–Ag2–N8               | 119.2(2) | N3–Ag3–N5 <sup>i</sup>               | 136.9(2) |
| N3–Ag3–N9 <sup>i</sup>  | 106.0(2) | N5 <sup>i</sup> –Ag3–N9 <sup>i</sup> | 116.9(2) |
| N6–Ag4–N7 <sup>ii</sup> | 174.2(2) |                                      |          |

Symmetry code: i: 1-x,1-y,-z; ii: -1+x,1+y,z

**3**

|                         |          |                        |          |
|-------------------------|----------|------------------------|----------|
| Ag1–N1                  | 2.096(5) | Ag2–N2                 | 2.144(6) |
| Ag2–N3 <sup>i</sup>     | 2.132(5) |                        |          |
| N1–Ag1–N1 <sup>ii</sup> | 167.2(3) | N2–Ag2–N3 <sup>i</sup> | 151.6(2) |

Symmetry code: i: -1+y,1-x,z; ii: -1/2+y,1/2+x,2-z
